# Supplementary material for: Reconstructing clonal tree for phylo-phenotypic characterization of cancer using single-cell transcriptomics
Source: PubMed Central journal article supplement (PMC9946941; doi:10.1038/s41467-023-36202-y), 2023-02-22
Supplement: 41467_2023_36202_MOESM1_ESM.pdf [file 41467_2023_36202_MOESM1_ESM.pdf]

1     Supplementary materials for Accurate reconstruction of clonal  
2     structure for phylo-phenotypic characterization of cancer clones  
3     using single-cell transcriptomics

4     Seong-Hwan Jun<sup>1,2</sup>, Hosein Toosi<sup>1</sup>, Jeff Mold<sup>3</sup>, Camilla Engblom<sup>3</sup>, Xinsong Chen<sup>4</sup>, Ciara  
5     O’Flanagan<sup>5</sup>, Michael Hagemann-Jensen<sup>3</sup>, Rickard Sandberg<sup>3</sup>, Samuel Aparicio<sup>5,8</sup>, Johan  
6     Hartman<sup>4,6</sup>, Andrew Roth<sup>\*5,7,8</sup>, and Jens Lagergren<sup>\*1</sup>

7             <sup>1</sup>SciLifeLab, School of EECS, KTH Royal Institute of Technology, Stockholm, Sweden

8             <sup>2</sup>Current affiliation: Fred Hutchinson Cancer Research Center, Seattle, USA

9             <sup>3</sup>Department of Cell and Molecular Biology, Karolinska Institutet, Solna, Sweden

10            <sup>4</sup>Department of Oncology and Pathology, Karolinska Institutet, Solna, Sweden

11            <sup>5</sup>Department of Molecular Oncology, BC Cancer, Vancouver, BC, Canada

12            <sup>6</sup>Department of Clinical Pathology and Cytology, Karolinska University Laboratory, Stockholm, Sweden.

13            <sup>7</sup>Department of Computer Science, University of British Columbia, Vancouver, Canada

14            <sup>8</sup>Department of Pathology and Laboratory Medicine, University of British Columbia, Vancouver, Canada

15     **Supplementary Note 1 - PhylEx probabilistic model**

16     **Marginalization over the copy number profiles for bulk data likelihood calculation**

17     We expand on the description of the marginalization process given the major and minor copy numbers. Note  
18     that we do not know whether the variant allele is located on the major or the minor copy and that the  
19     number of variant copies is also unknown. Let A denote the reference allele and B denote the variant allele.  
20     For illustration, consider  $(M_n, m_n) = (1, 1)$ , i.e., copy number neutral. Then, the possible genotypes are  
21     A/B or B/A but the two are the indistinguishable and hence,  $\mathcal{G}(1, 1) = \{A/B\}$ . If  $(M_n, m_n) = (2, 1)$ , then  
22      $\mathcal{G}(M_n, m_n) = \{AA/B, BA/A, BB/A\}$ . To see this, note that if the variant allele is on the major copy, then  
23     we have two possibilities, 1) both copies harbour the variant (BB/A) or 2) only one copy harbours the variant  
24     (BA/A). If the variant is on the minor copy and since the minor copy number is 1, the only possible case is  
25     AA/B. We use uniform prior over the possible elements of the genotype.

26     **Estimating hyperparameters of scRNA-seq data**

   Our primary interest is in estimating  $\alpha_n, \beta_n$  as a part of the preprocessing step. We describe a simple  
   approach that we used in the data analysis. Our approach is to predict  $\delta_{c,n}$  first, then estimate  $\alpha_n, \beta_n$  using  
   Beta-Binomial conjugacy. To predict  $\delta_{c,n}$ , we compute:

$$P(\delta_{c,n} = 1 | b_{c,n}, \alpha_n^0, \beta_n^0, \alpha_0, \beta_0, \delta_0) \propto P(b_{c,n} | \delta_{c,n} = 1, \alpha_n^0, \beta_n^0, \alpha_0, \beta_0, \delta_0) P(\delta_{c,n} = 1 | \delta_0), \quad (1)$$

   where  $\alpha_n^0, \beta_n^0$  quantify initial belief over the parameters for bi-allelic Beta distribution. We set  $\alpha_n^0 = \beta_n^0 = 1$ ,  
   which defines the Uniform distribution on  $[0, 1]$ ,  $\delta_0 = 0.5$ , and  $\alpha_0 = \beta_0 = 0.05$ . Given  $\delta_{c,n}$ , the hyper  
   parameter update is,

$$\alpha_n = \alpha_n^0 + \sum_{n:\delta_{c,n}=1} b_{c,n} \quad (2)$$

$$\beta_n = \beta_n^0 + \sum_{n:\delta_{c,n}=1} (d_{c,n} - b_{c,n}), \quad (3)$$

27     which is the standard update formula for Beta-Binomial hyperparameters.

## 28 Supplementary Note 2 - Simulated data generation

### 29 Simulating clone tree

30 We generate a binary tree with the root node representing the non-malignant ancestor. The root node has  
31 exactly one child, representing progenitor cancer clone with cellular prevalence of 0.5. We grow the tree  
32 starting from the progenitor clone such that each node has exactly two children; each child breaks half of the  
33 parent’s remaining clone fraction:  $\phi_u = 0.5\eta_{\rho(u)}$  where  $\rho(u)$  denotes the parent of  $u$ . We terminate expansion  
34 of a lineage when the depth reaches the maximum specified or the cellular prevalence of the terminal node of  
35 the lineage falls below minimum threshold. In the simulated experiments, we set the maximum depth to 3  
36 (depth of the root node is 0) and minimum cellular prevalence to 0.05. This results in a binary tree with  
37 eight nodes as shown in Supplementary Figure 8 g. We have an implementation that allows the cellular  
38 prevalence to be randomly sampled but generating the cellular prevalence in a determined manner creates  
39 for an interesting and challenging scenario. In particular, there are two pairs of clones that have the same  
40 cellular prevalence of 0.125 and 0.0625. Having clones with the same cellular fraction makes it difficult for  
41 reconstruction based on variant allele frequencies alone. To simulate the multifurcating tree, we again set the  
42 root node to be the healthy clone and it has exactly one child that represents the progenitor cancer clone.  
43 Starting from the progenitor cancer clone, we grow the tree by randomly selecting number of children from  
44  $\{1, 2, 3, 4\}$ . The clone fraction of the children nodes are determined in the same way as for the binary tree.  
45 We stop the lineage expansion when the maximum depth of 3 or the minimum cellular prevalence of 0.05 is  
46 reached. Examples of trees generated for simulation studies is shown in Supplementary Figure 8 h-i.

### 47 Bulk data generation

48 To model cancer’s complex structural variation and to study the effect of copy number misspecification, we  
49 use birth-death process to simulate copy number profiles. Birth-death process is parameterized by the birth  
50 rate and the death rate, with maximum copy number of 10 and the absorbing copy number of 0, i.e., once  
51 the copy number reaches 0, it does not evolve. We first construct two rate matrices,  $\mathbb{Q}_0$  with minimum copy  
52 number state of 0 and  $\mathbb{Q}_1$  with the minimum copy number state of 1 [3]. The transition matrices are obtained  
53 via matrix exponentiation,  $\mathbb{P}_0 = \exp(\mathbb{Q}_0)$  and  $\mathbb{P}_1 = \exp(\mathbb{Q}_1)$ .

54 Let SNV  $n$  be assigned to node  $u$  of the tree. We initialize the copy number at the root node with the  
55 value of 2. We then separate copy number evolution into three parts. The first part is along the branches from  
56 the root node to  $u$ . We evolve the copy number using  $\mathbb{P}_1$ , this ensures that there is at least one copy by the  
57 time we get to node  $u$ . Let  $X'_{n,u}$  be the copy number at node  $u$ , we then sample  $Y'_{n,u} \sim \text{Binomial}(X'_{n,u} - 1, \xi)$ ,  
58 where  $\xi \in (0, 1)$ . Then, we set the variant copy number at  $u$  as  $Y_{n,u} = Y'_{n,u} + 1$  and set the reference copy  
59 number as  $X_{n,u} = X'_{n,u} - Y'_{n,u}$ . The second part is copy number evolution starting at node  $u$ , which is  
60 initialized with copy number profile of  $(X_{n,u}, Y_{n,u})$ . We evolve  $(X_{n,u}, Y_{n,u})$  independently using  $\mathbb{P}_0$  to the  
61 leaf nodes. The third part is copy number evolution over all of the other branches, that is, the branches not  
62 in the path from root node to  $u$  and not in the subtree rooted at  $u$ . The copy numbers are evolved using  $\mathbb{P}_0$   
63 for these branches.

Once we have the full copy number profile at each clone, then we take the weighted averages,

$$\bar{X}_n = \sum_{v \in T} \eta_v X_{n,v} \quad (4)$$

$$\bar{Y}_n = \sum_{v \in T} \eta_v Y_{n,v} \quad (5)$$

$$\bar{D}_n = \sum_{v \in T} \eta_v (X_{n,v} + Y_{n,v}) \quad (6)$$

We round  $\bar{X}_n, \bar{Y}_n$ , then sort  $(\bar{X}_n, \bar{Y}_n)$  to convert it to integer-valued major and minor copy numbers for PhylEx and other software used in the study. Note that these copy numbers provided as input to PhylEx does not fully capture the true copy number state of the cancer, which is as we desired to study the effect of scRNA-seq in mitigating the inaccuracies from the copy number detection step. The bulk data read counts

are generated as follows:

$$d_n \sim \text{Poisson}(d_0 \cdot \bar{D}_n/2) \tag{7}$$

$$b_n \sim \text{Binomial}(d_n, \xi_n), \tag{8}$$

64 where  $d_0$  is the desired mean depth, set to 1,000 in the simulation studies and  $\xi_n = \bar{Y}_n/\bar{D}_n$ , denoting the  
65 probability of observing a variant read. The division by factor of 2 arises when we consider  $\bar{D}_n = 2$ , e.g.,  
66 when there is no copy number variation. In that case, to ensure the realized depth has mean  $d_0$ , we need to  
67 divide by 2. The birth rate of 1 and death rate of 0.2 was used in simulated data generation.

## 68 Simulating scRNA-seq data

69 Given the tree and the SNV-to-clone assignment, we first sample a cell-to-clone assignment for each of the  
70 cells. Assigning cell to a clone determines its genotype, call it  $\mathcal{G}_c$ . We randomly select a subset of SNVs to  
71 be expressed, denoted  $\mathcal{E}_c$ . For  $n \in \mathcal{G}_c \cap \mathcal{E}_c$ , we first sample the depth,  $d_{c,n}$  from Poisson distribution with  
72 mean expression level  $e_0$ . Then, we sample from Bernoulli distribution to set  $\delta_{c,n}$ ; the parameter of Bernoulli  
73 corresponds to bi-allelic expression probability – we used 0.2 in the simulation. If  $\delta_{c,n} = 1$ , we sample  $b_{c,n}$   
74 from Beta-Binomial( $d_{c,n}, \alpha_n, \beta_n$ ). The hyperparameters  $\alpha_n, \beta_n$  are sampled from uniform distribution with  
75 over  $(0, max)$  with  $max = 10$ . If  $\delta_{c,n} = 0$ , we sample  $b_{c,n}$  from Beta-Binomial( $d_{c,n}, \alpha_0, \beta_0$ ) with parameters  
76  $\alpha_0 = \beta_0 = 0.01$ . For  $n \in \mathcal{E}_c \setminus \mathcal{G}_c$ , we sample  $b_{c,n}$  from Beta-Binomial( $d_{c,n}, \epsilon, 1 - \epsilon$ ), where  $\epsilon = 0.01$  denotes  
77 the sequencing error (Supplementary Figure 7 c). As the loci  $n$  is expressed but the cell does not harbor the  
78 SNV, we expect to observe a variant read only in error. For  $n \notin \mathcal{E}_c$ , we set  $d_{c,n} = b_{c,n} = 0$ .

## 79 Supplementary Note 3 - Software settings

80 In this section, we describe the software settings for running PhylEx, TSSB/PhyloWGS, Canopy, B-SCITE,  
81 ddClone, and InferCNV. Each of the above methods except InferCNV either adopts a full Bayesian approach  
82 or offer a version that uses Bayesian sampling; we used 4 MCMC chains in parallel where applicable. PhylEx,  
83 TSSB/PhyloWGS, Canopy, B-SCITE, ddClone, and InferCNV were applied to simulated and HGSOC data.  
84 PhylEx, TSSB, and InferCNV were applied to HER2+ data as well as simulated and HGSOC data.

## 85 PhylEx and TSSB/PhyloWGS

86 PhylEx and PhyloWGS use TSSB prior, which is parameterized by  $\lambda_0, \lambda, \gamma$ . The support set for each of  
87 these parameters are bounded:  $\lambda_0 \in [\lambda_0^{min}, \lambda_0^{max}]$ ,  $\lambda \in [\lambda^{min}, \lambda^{max}]$ , and  $\gamma \in [\gamma^{min}, \gamma^{max}]$ . Therefore, the  
88 hyperparameters to be specified are:  $0 \leq \lambda_0^{min} \leq \lambda_0^{max} < \infty$ ;  $0 \leq \lambda^{min} \leq \lambda^{max} < 1$ ;  $0 \leq \gamma^{min} \leq \gamma^{max} < \infty$ .  
89 The TSSB prior allows exploration of various tree topologies to best fit the data given these boundaries. In  
90 other words, it does not require *a priori* specification of the number of clones or whether the evolution is  
91 linear, bifurcating, or multifurcating. Our recommendation is to set the lower bounds to 0 and start with  
92 relatively large value for the max parameters:  $\lambda_0^{max} = 10, \lambda^{max} = 0.8, \gamma^{max} = 0.5$ . All three methods also  
93 require copy number information. PhyloWGS requires *subclonal* copy number information but we were not  
94 able to generate sensible copy number input even after following the software documentation. Therefore, we  
95 implemented a method underlying PhyloWGS based on our implementation of TSSB prior that takes in the  
96 same clonal copy number input as PhylEx – we simply refer to our implementation of PhyloWGS as TSSB.  
97 The copy number information is generated using TitanCNA for both PhylEx and TSSB.

98 All three methods share sequencing error probability,  $0 < \epsilon \ll 1$ . With advances in sequencing technologies,  
99 we recommend setting  $\epsilon$  to a small value:  $\epsilon \in \{0.001, 0.005, 0.01\}$ . In addition, PhylEx requires hyper  
100 parameters  $\alpha_0, \beta_0$  for Beta-Binomial distribution for modelling mono-allelic expression for scRNA-seq data.  
101 From exploratory analysis of the real scRNA-seq data, we found that setting  $\alpha_0 = \beta_0 = 0.01$  fit the data well.

## 102 Simulated data

103 For PhylEx and TSSB, we used  $\lambda_0 = 10, \lambda = 0.8, \gamma = 0.5, \epsilon = 0.001, \alpha_0 = \beta_0 = 0.01$ . We ran the slice sampler  
104 for 2,000 iterations, each iteration performed 2,000 Metropolis-Hastings iterations to sample the cellular

105 prevalences. For PhyloWGS, we used the default settings:  $\lambda_0 = 25.0, \lambda = 0.25, \gamma = 1.0, \epsilon = 0.001$ . The slice  
106 sampler was ran for 3,500 iterations with first 1,000 iterations as burn-in. Each iteration performed 5,000  
107 Metropolis-Hastings iterations to sample the cellular prevalences.

## 108 HGSOC

109 We ran PhylEx and TSSB using  $\lambda_0 = 2, \lambda = 0.5, \gamma = 0.5, \epsilon = 0.001, \alpha_0 = \beta_0 = 0.01$ . We ran the slice sampler  
110 for 10,000 iterations, each iteration performed 2,000 Metropolis-Hastings iterations to sample the cellular  
111 prevalences. We ran PhylEx and TSSB with 20 chains to generate the standard error estimates on the  
112 performance measures, i.e., to ensure good performance is not achieved by chance.

## 113 HER2+

114 We ran PhylEx and TSSB using  $\lambda_0 = 2, \lambda = 0.5, \gamma = 0.5, \epsilon = 0.01, \alpha_0 = \beta_0 = 0.01$ . We ran the slice sampler  
115 for 30,000 iterations with 2,000 MH iterations to sample the cellular prevalences.

## 116 Canopy

117 Canopy requires specification of the number of clones, copy number information, and the minimum and  
118 maximum number of MCMC iterations to use. As the number of clones is typically unknown in practice,  
119 Canopy recommends to try a range of values and to select the number of clone yielding the highest likelihood.  
120 We specified values from 3 to 12 in all experiments where Canopy was applied. Canopy requires copy number  
121 information to be generated from Falcon copy number analysis software [4]. We used default settings to run  
122 Falcon. Finally, we used 4 chains and specified 10,000 as the minimum MCMC iterations to use and 100,000  
123 as the maximum MCMC iterations.

## 124 B-SCITE

125 B-SCITE requires false positive and false negative parameters. The scRNA-seq data typically will have high  
126 false negative rate due to bursty expression whereas false positive rate may be low. In all experiments, we  
127 used the false positive rate of 0.01 and false negative rate of 0.2. We ran 4 replicates each with 20,000 MCMC  
128 iterations in all experiments.

## 129 ddClone

130 ddClone requires tumor content and copy number information to be specified. We use 1.0 as the tumor  
131 content in all of the experiments. Note that the tumor content is used by ddClone to parameterize the bulk  
132 data likelihood. Specifying the value of 1.0 as the tumor content simplifies the ddClone bulk data likelihood to  
133 rely on cellular prevalences of each clone in computing the bulk data likelihood, which is essentially the same  
134 approach as the one used by PhylEx. Hence, using the value of 1.0 allows to compare PhylEx to ddClone in  
135 the respective method's handling of the single cell data likelihood. Note also that HGSOC is a cancer cell-line  
136 data, which justifies specification of 1.0 as the tumor content. The copy number information is generated  
137 using TitanCNA as for PhylEx and TSSB. We ran 4 chains each with 20,000 MCMC iterations for both the  
138 simulated and HGSOC data.

## 139 Single cell genotyping for B-SCITE and ddClone

140 To run B-SCITE and ddClone on the HGSOC data, we needed to perform genotyping for each cell. We used  
141 BCF-tools version 1.10.2 'mpileup' followed by 'call' with option '-P 0.1 -mv'.

## 142 InferCNV

143 We have also used InferCNV to compare SNV clones to CNV clones. We used the denoising function and  
144 HMM with 6 states using 'subcluster' analysis mode. We used the default setting for all other parameters.  
145 InferCNV was applied to HGSOC and HER2+ data using the same settings.

## 146 References

- 147 [1] Ryan P Adams, Zoubin Ghahramani, and Michael I Jordan. Tree-structured stick breaking for hierarchical  
148 data. In *Advances in Neural Information Processing Systems*, pages 19–27, 2010.
- 149 [2] Wei Jiao, Shankar Vembu, Amit G Deshwar, Lincoln Stein, and Quaid Morris. Inferring clonal evolution  
150 of tumors from single nucleotide somatic mutations. *BMC bioinformatics*, 15(1):35, 2014.
- 151 [3] Geoffrey Grimmett and David Stirzaker. *Probability and random processes*. Oxford university press, 2020.
- 152 [4] Hao Chen, John M Bell, Nicolas A Zavala, Hanlee P Ji, and Nancy R Zhang. Allele-specific copy number  
153 profiling by next-generation dna sequencing. *Nucleic acids research*, 43(4):e23–e23, 2015.

<sup>154</sup> **Supplementary tables and figures**

Supplementary Table 1: Full list of down regulated pathways in EF compared to ABCD clone (FDR < 0.01). The pathways related to the immune system are found to be down regulated. The first column is the name of the gene ontology. The second column is the p-value. The third column is the false discovery rate.

| GeneOntology                                                               | P.Value     | FDR         |
|----------------------------------------------------------------------------|-------------|-------------|
| MHC protein complex                                                        | 4.85e-15    | 1.32e-11    |
| Antigen processing and presentation of endogenous antigen                  | 6.40e-15    | 1.32e-11    |
| MHC class I protein complex                                                | 6.57e-14    | 8.08e-11    |
| Response to type I interferon                                              | 2.86e-11    | 1.60e-08    |
| Antigen processing and presentation of endogenous peptide antigen          | 2.61e-10    | 1.14e-07    |
| Positive regulation of T cell mediated cytotoxicity                        | 7.96e-09    | 2.51e-06    |
| Interferon gamma mediated signaling pathway                                | 2.08e-08    | 5.72e-06    |
| Regulation of T cell mediated cytotoxicity                                 | 2.37e-08    | 6.07e-06    |
| Positive regulation of antigen processing and presentation                 | 4.99e-07    | 9.59e-05    |
| Detection of other organism                                                | 6.87e-07    | 0.00012799  |
| Luminal side of membrane                                                   | 1.11e-06    | 0.00019995  |
| Positive regulation of interleukin 1 beta production                       | 1.28e-06    | 0.000224036 |
| Positive regulation of interleukin 1 production                            | 3.82e-06    | 0.000572277 |
| Response to interferon gamma                                               | 6.86e-06    | 0.000937457 |
| Peptide antigen binding                                                    | 7.05e-06    | 0.000942833 |
| Negative regulation of natural killer cell mediated immunity               | 1.08e-05    | 0.001205857 |
| Negative regulation of natural killer cell mediated cytotoxicity           | 1.08e-05    | 0.001205857 |
| Phagocytic vesicle                                                         | 1.14e-05    | 0.001242962 |
| Regulation of alpha beta T cell proliferation                              | 1.15e-05    | 0.001242962 |
| Regulation of T cell mediated immunity                                     | 1.53e-05    | 0.001563431 |
| Positive regulation of type 2 immune response                              | 1.59e-05    | 0.001597496 |
| Negative regulation of cell killing                                        | 1.93e-05    | 0.001857438 |
| Negative T cell selection                                                  | 2.23e-05    | 0.002108729 |
| Positive regulation of T cell mediated immunity                            | 2.57e-05    | 0.002359283 |
| Positive regulation of leukocyte mediated immunity                         | 2.78e-05    | 0.00247885  |
| Phagocytic vesicle membrane                                                | 5.80e-05    | 0.004752687 |
| Positive regulation of production of molecular mediator of immune response | 6.43e-05    | 0.005199606 |
| Positive regulation of alpha beta T cell proliferation                     | 6.85e-05    | 0.00526053  |
| Positive regulation of lymphocyte mediated immunity                        | 7.89e-05    | 0.005915636 |
| Cellular response to interferon gamma                                      | 9.11e-05    | 0.006670378 |
| Positive regulation of interleukin 12 production                           | 9.48e-05    | 0.006857689 |
| MHC class II protein complex                                               | 0.000131493 | 0.009186575 |

Supplementary Table 2: Summary statistics on genes used in the analysis of HER2+ breast cancer data. The first column lists the gene names. The second column indicates the number of cells with coverage on the gene. The third column is the mean number of reads over the cells at the gene. Source data are provided as a Source Data file.

| Gene            | Cell Count | Mean Reads |
|-----------------|------------|------------|
| <i>PIK3R3</i>   | 310        | 66.74      |
| <i>FN1</i>      | 106        | 19.36      |
| <i>WNT10A</i>   | 0          | 0          |
| <i>CACNA2D2</i> | 166        | 3.92       |
| <i>DKK2</i>     | 0          | 0          |
| <i>PITX2</i>    | 0          | 0          |
| <i>MDC1</i>     | 108        | 4.50       |
| <i>EZH2</i>     | 241        | 18.25      |
| <i>COL4A5</i>   | 156        | 7.81       |
| <i>PRKDC</i>    | 307        | 34.13      |
| <i>PRKACG</i>   | 0          | 0          |
| <i>IL2RA</i>    | 0          | 0          |
| <i>MAP3K8</i>   | 306        | 122.36     |
| <i>DDX50</i>    | 111        | 4.73       |
| <i>ACVR1B</i>   | 219        | 9.59       |
| <i>FGF14</i>    | 4          | 0.22       |
| <i>POLE2</i>    | 47         | 1.43       |
| <i>FOS</i>      | 377        | 3003.54    |
| <i>VPS33B</i>   | 102        | 4.50       |
| <i>TP53</i>     | 271        | 15.35      |
| <i>NF1</i>      | 331        | 123.16     |
| <i>CDC6</i>     | 70         | 5.37       |
| <i>CACNG4</i>   | 241        | 19.44      |
| <i>ETS2</i>     | 223        | 27.08      |



Supplementary Table 3: Performance metric of PhylEx on HGSOc when hyperparameter supports are varied. The first column lists the hyperparameters. The second, third, and fourth columns are clustering metrics used for comparison, where higher value is preferred. The last column is the ancestral reconstruction error metric, where lower value is preferred. The standard error estimates were obtained by repeating the experiments 20 times. Source data are provided as a Source Data file.

| $(\lambda_0^{max}, \lambda^{max}, \gamma^{max})$ | V-Measure          | Adj. Rand Index    | Adj. Mut Info       | Anc. Recon Err      |
|--------------------------------------------------|--------------------|--------------------|---------------------|---------------------|
| (1, 0.2, 0.5)                                    | $0.859 \pm 0.0590$ | $0.851 \pm 0.1043$ | $0.827 \pm 0.07184$ | $0.0498 \pm 0.0348$ |
| (5, 1, 0.2)                                      | $0.868 \pm 0.0188$ | $0.884 \pm 0.0227$ | $0.836 \pm 0.0252$  | $0.0394 \pm 0.0099$ |
| (5, 1, 1)                                        | $0.870 \pm 0.0132$ | $0.888 \pm 0.0164$ | $0.839 \pm 0.0175$  | $0.0379 \pm 0.0077$ |
| (10, 1, 1)                                       | $0.863 \pm 0.0217$ | $0.882 \pm 0.0180$ | $0.830 \pm 0.0276$  | $0.0378 \pm 0.0046$ |

Supplementary Table 4: Table of notation used for random variables, their descriptions, and whether they are inferred, marginalized, pre-estimated, or taken as user input.

|                              |                                                            |                       |
|------------------------------|------------------------------------------------------------|-----------------------|
| $T$                          | Clonal tree                                                | Inferred              |
| $z$                          | SNV assignment                                             | Inferred              |
| $\phi$                       | Cellular prevalence                                        | Inferred              |
| $\lambda_0, \lambda, \gamma$ | TSSB hyperparameters                                       | Inferred              |
| $\zeta_c$                    | Cell assignment to clone                                   | Inferred/Marginalized |
| $\delta_{c,n}$               | Indicator of bi-allelic expression for cell at loci        | Marginalized          |
| $\delta_n^0$                 | Prior probability of bi-allelic expression                 | User input            |
| $\epsilon$                   | Sequencing error probability                               | User input            |
| $\alpha_0, \beta_0$          | Mono-allelic expression hyperparameters                    | User input            |
| $\alpha_n, \beta_n$          | Bi-allelic expression hyperparameters for loci             | Pre-estimated         |
| $b_n, d_n$                   | Variant read counts and total read counts for loci         | Observed              |
| $b_{c,n}, d_{c,n}$           | Variant read counts and total read counts for cell at loci | Observed              |
| $M_n, m_n$                   | Major and minor copy number profiles for loci              | Pre-estimated         |

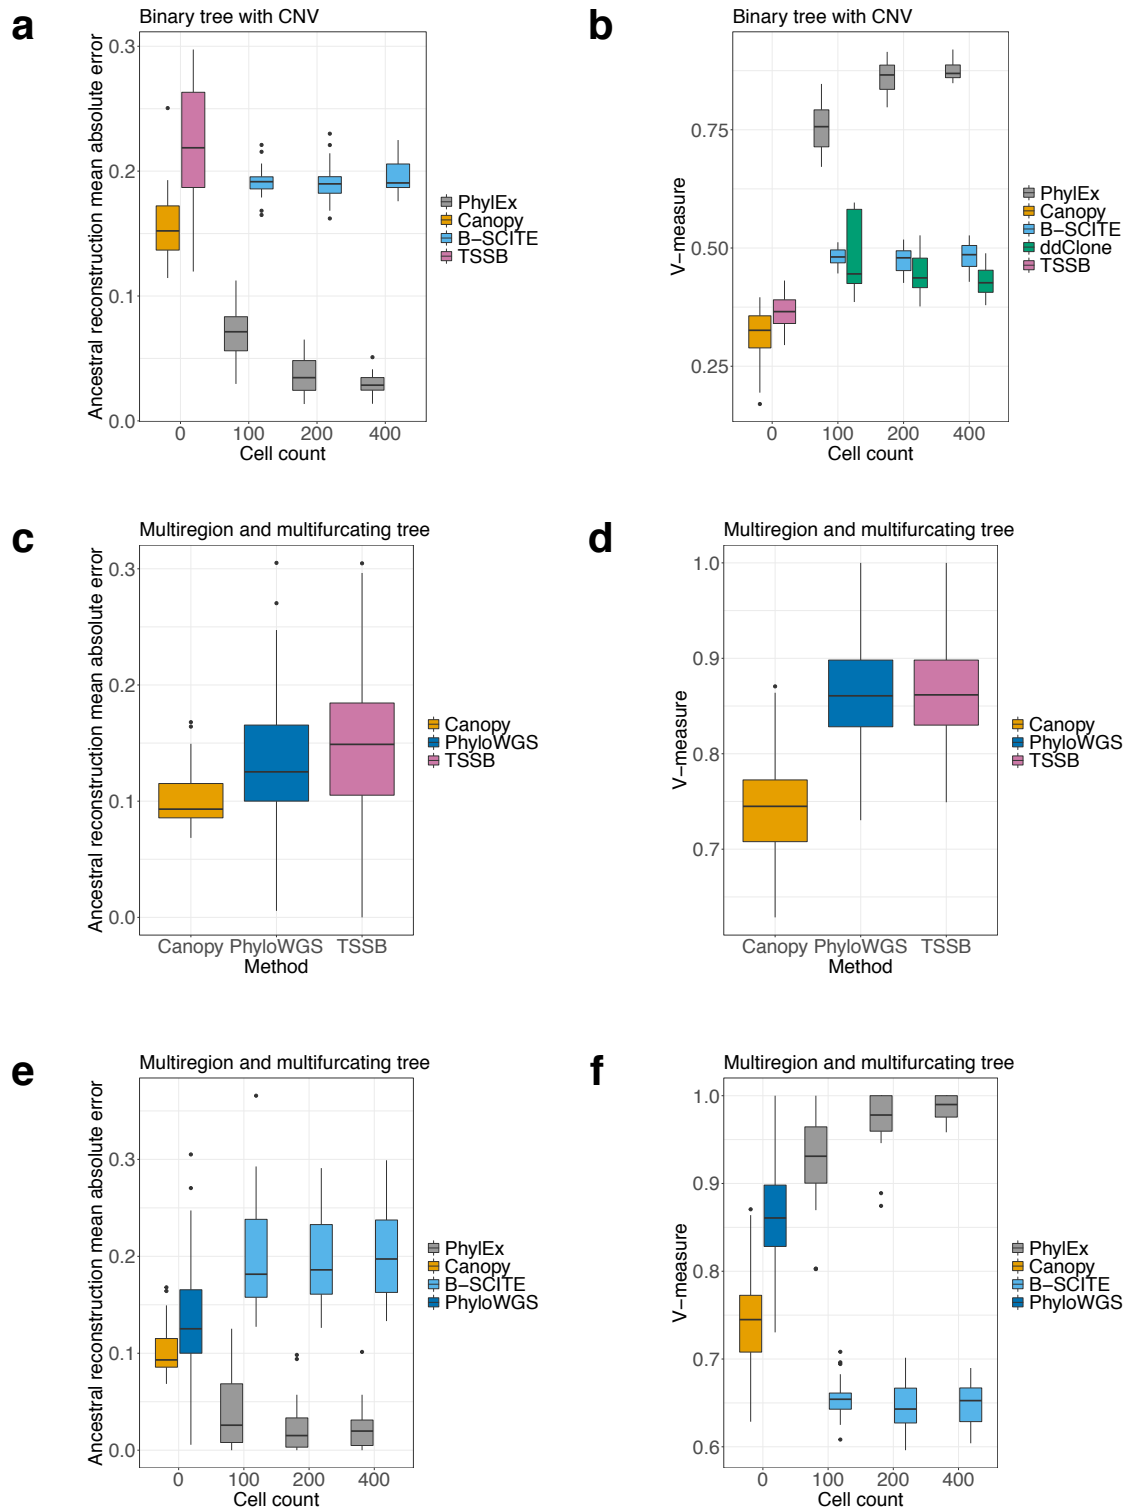

Supplementary Figure 1: Supplementary simulation analysis results. Data generated with 100 SNVs with 20 replicates to derive the error bars. a-b. Binary tree with copy number evolution on mean absolute reconstruction error and V-measure clustering metric. c-d. Comparison of bulk based deconvolution methods on binary tree. e-f. Comparison of bulk based deconvolution methods on multifurcating tree using multi-region bulk data. The box plot shows the median and inter-quantile range (IQR) at the 1st and the 3rd quantiles; the top (bottom) whisker indicates the maximal (minimal) point no further than  $1.5 \times$  IQR from the third (first) quantile. Source data are provided as a Source Data file.

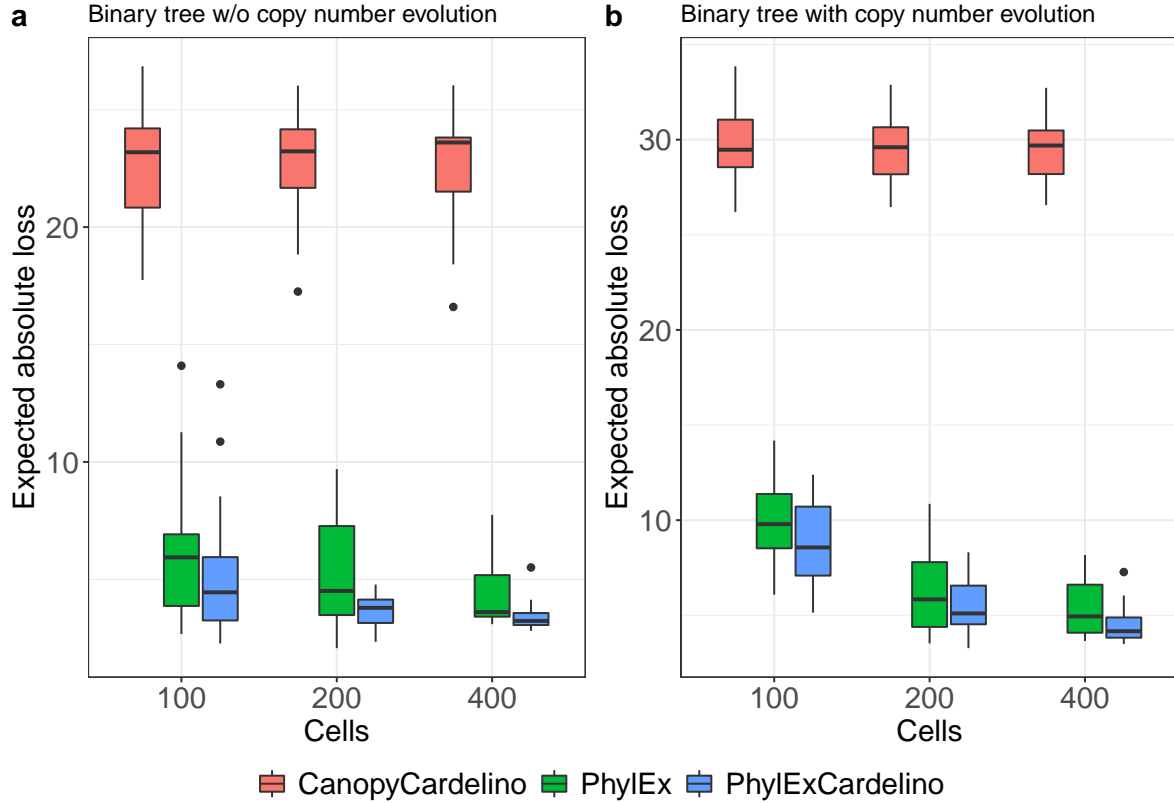

Supplementary Figure 2: Comparison of mapping of scRNA-seq to clones using two stage approach (Canopy-Cardelino) to clones inferred using PhylEx (PhylExCardelino and PhylEx) on expected loss. Data simulated from binary trees a. without copy number variants and b. with copy number evolution. Data generated with 100 SNVs and simulation repeated over 20 replicates to derive the error bars. The box plot shows the median and inter-quantile range (IQR) at the 1st and the 3rd quantiles; the top (bottom) whisker indicates the maximal (minimal) point no further than  $1.5 \times$  IQR from the third (first) quantile. Source data are provided as a Source Data file.

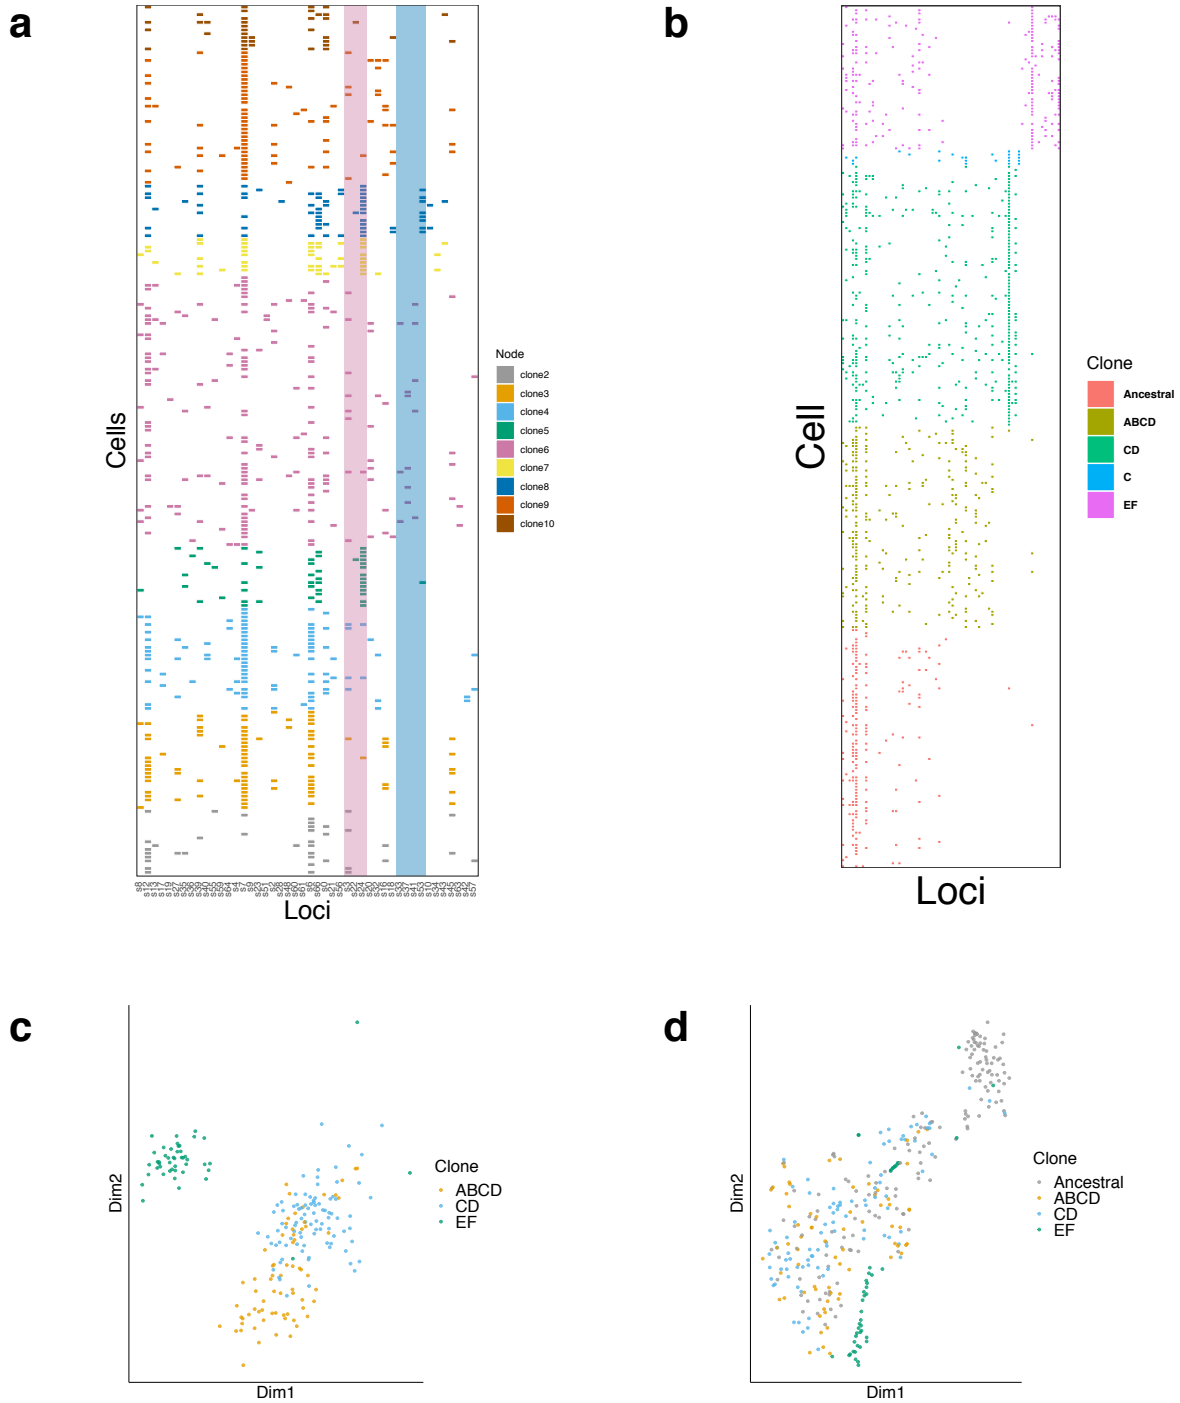

Supplementary Figure 3: Additional HGSOC cell line biological analysis results. Plot of variant read counts as absence/presence heatmap after co-clustering by cells and SNVs. a. using Cardelino on Canopy tree. The mutations exclusive to clones 6 is annotated by red and similarly for clone 8 in blue. Cells assigned to other clones are seen to carry evidence of mutation on these loci, demonstrating the problem of two-step approach. b. using PhylEx. c. Plot of gene expressions of cells after performing ZINB-WaVE dimension reduction – plotted without ancestral cells. d. Plot of gene expressions of cells after performing t-SNE dimensions reduction. Source data are provided as a Source Data file.

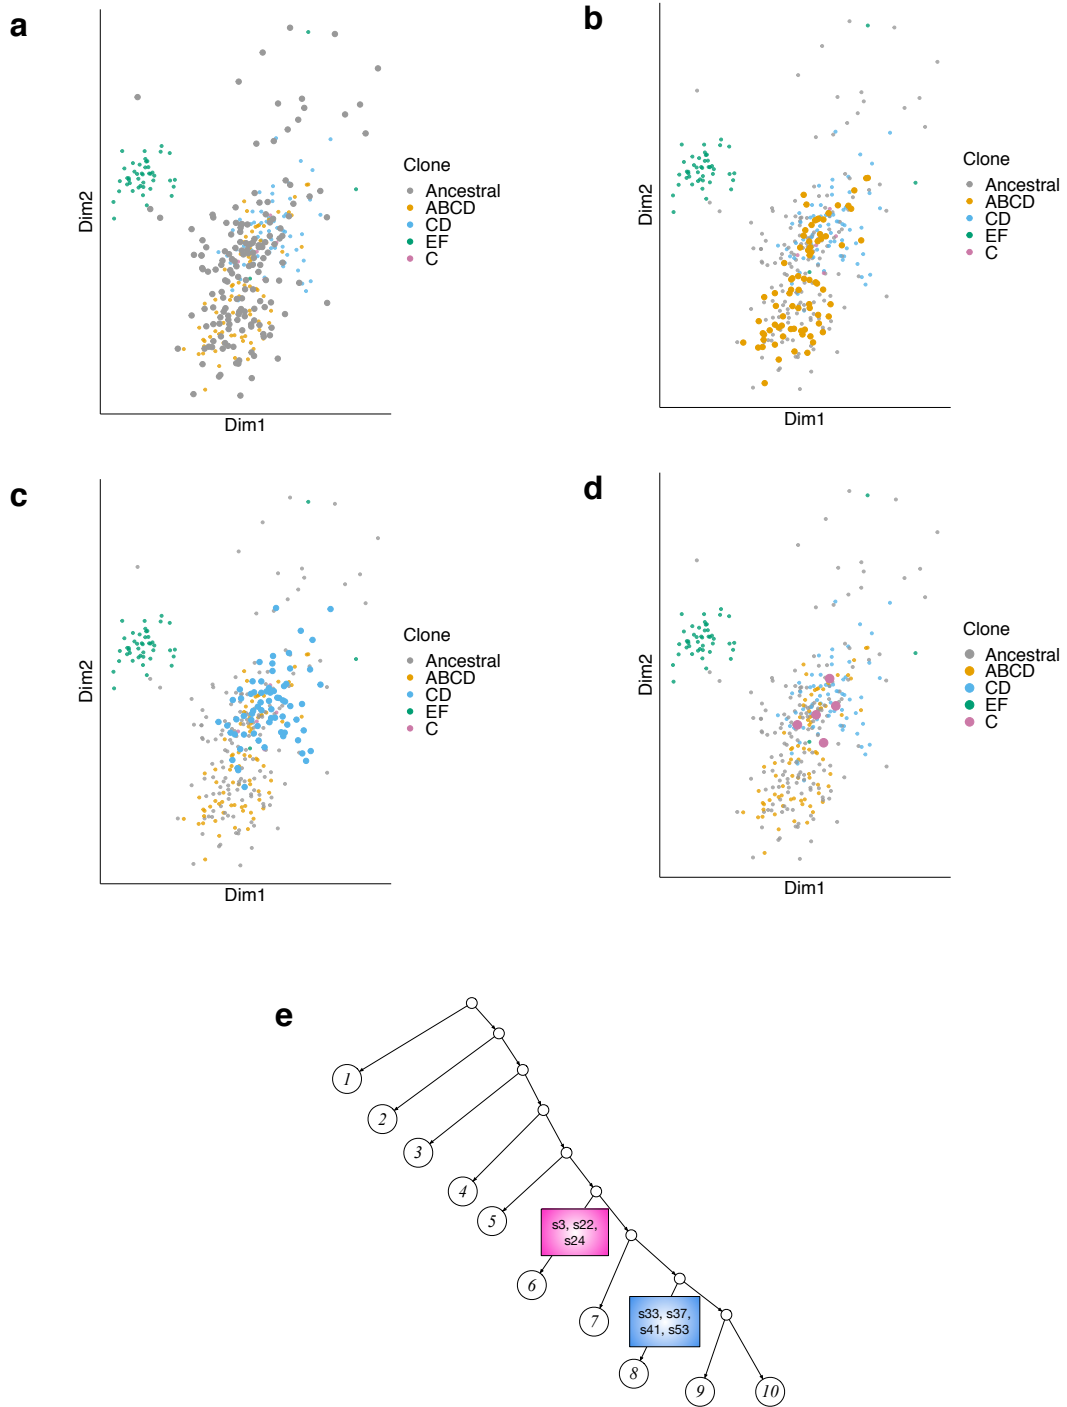

Supplementary Figure 4: Additional HGSOc cell line biological analysis results. Plot of gene expressions of cells after performing ZINB-WaVE dimension reduction with dot sizes expanded for a. clone ancestral, b. clone ABCD, c. clone CD, d. clone C. e. Tree inferred by running Canopy on HGSOc data. Mutations occurring exclusively for Clone 6 (pink) and Clone 8 (blue) are highlighted. Source data are provided as a Source Data file.

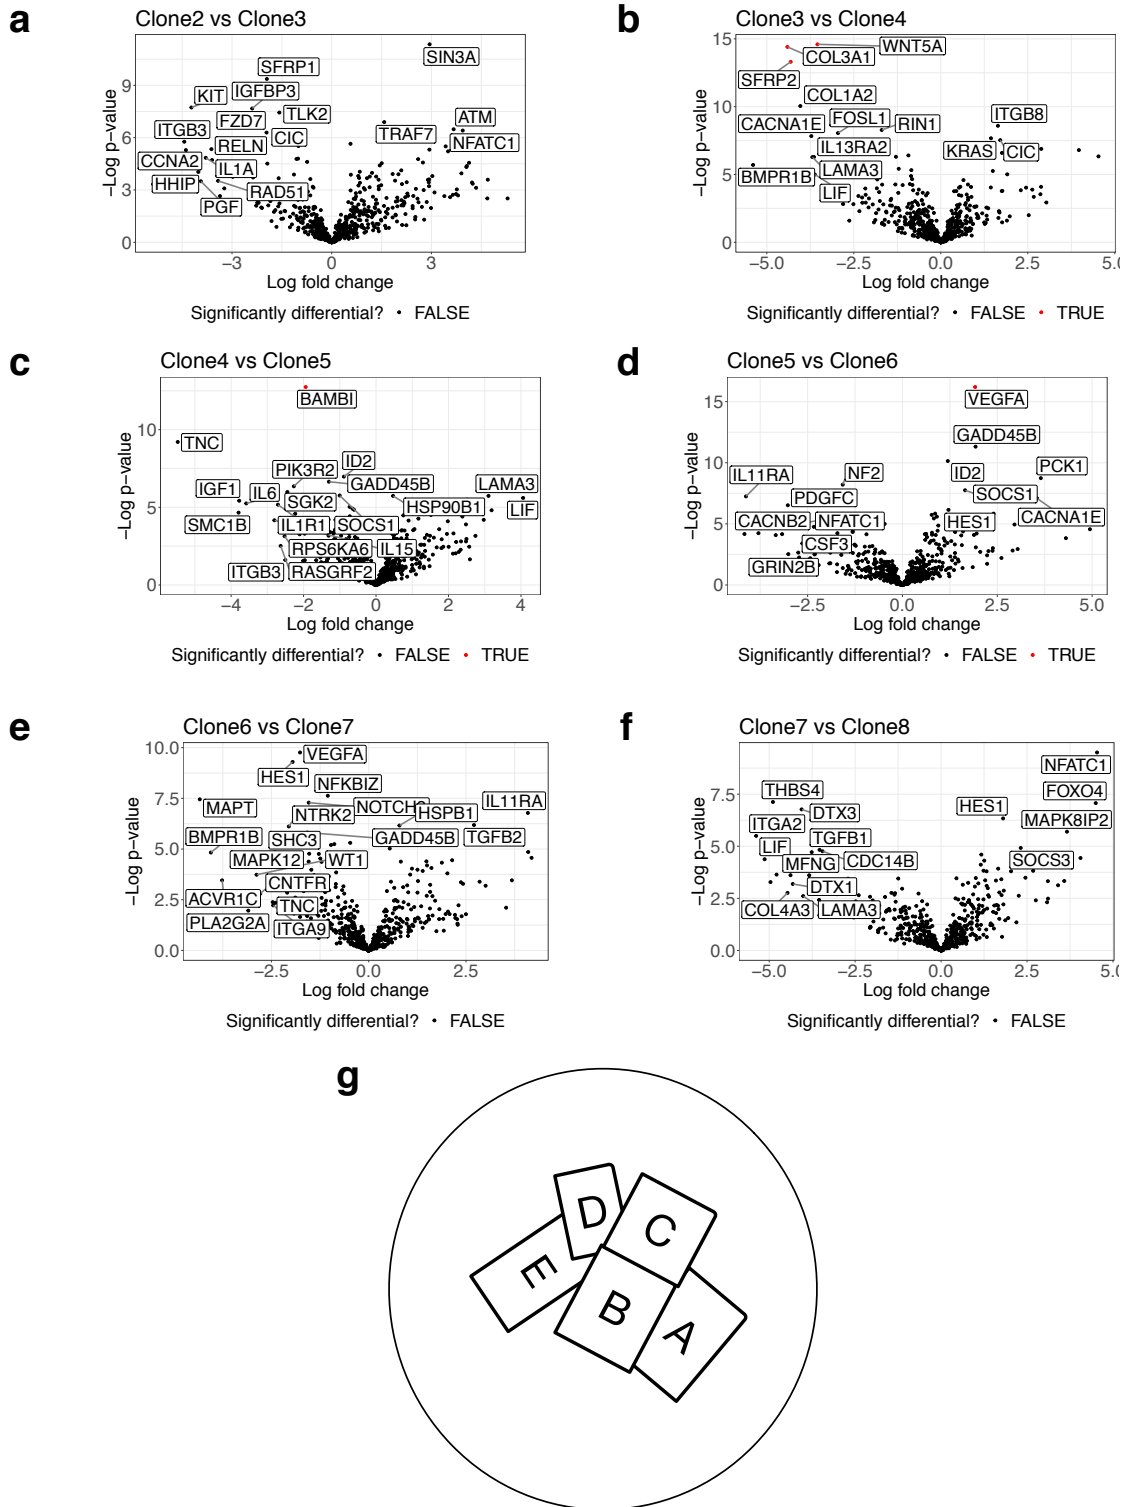

Supplementary Figure 5: a-f. Volcano plots comparing all parent-child clone pairs. g. Schematic depiction of the locations of multi-regional sampling for HER2+. The proximity of the regions A, B, and C explains the homogeneity in their clone fractions. The region D is remote from region A and the region E does not have any overlap with regions A and C, which explains the differences in the clone fractions in regions D, E to regions A, B, and C. Source data for a-f are provided as a Source Data file.

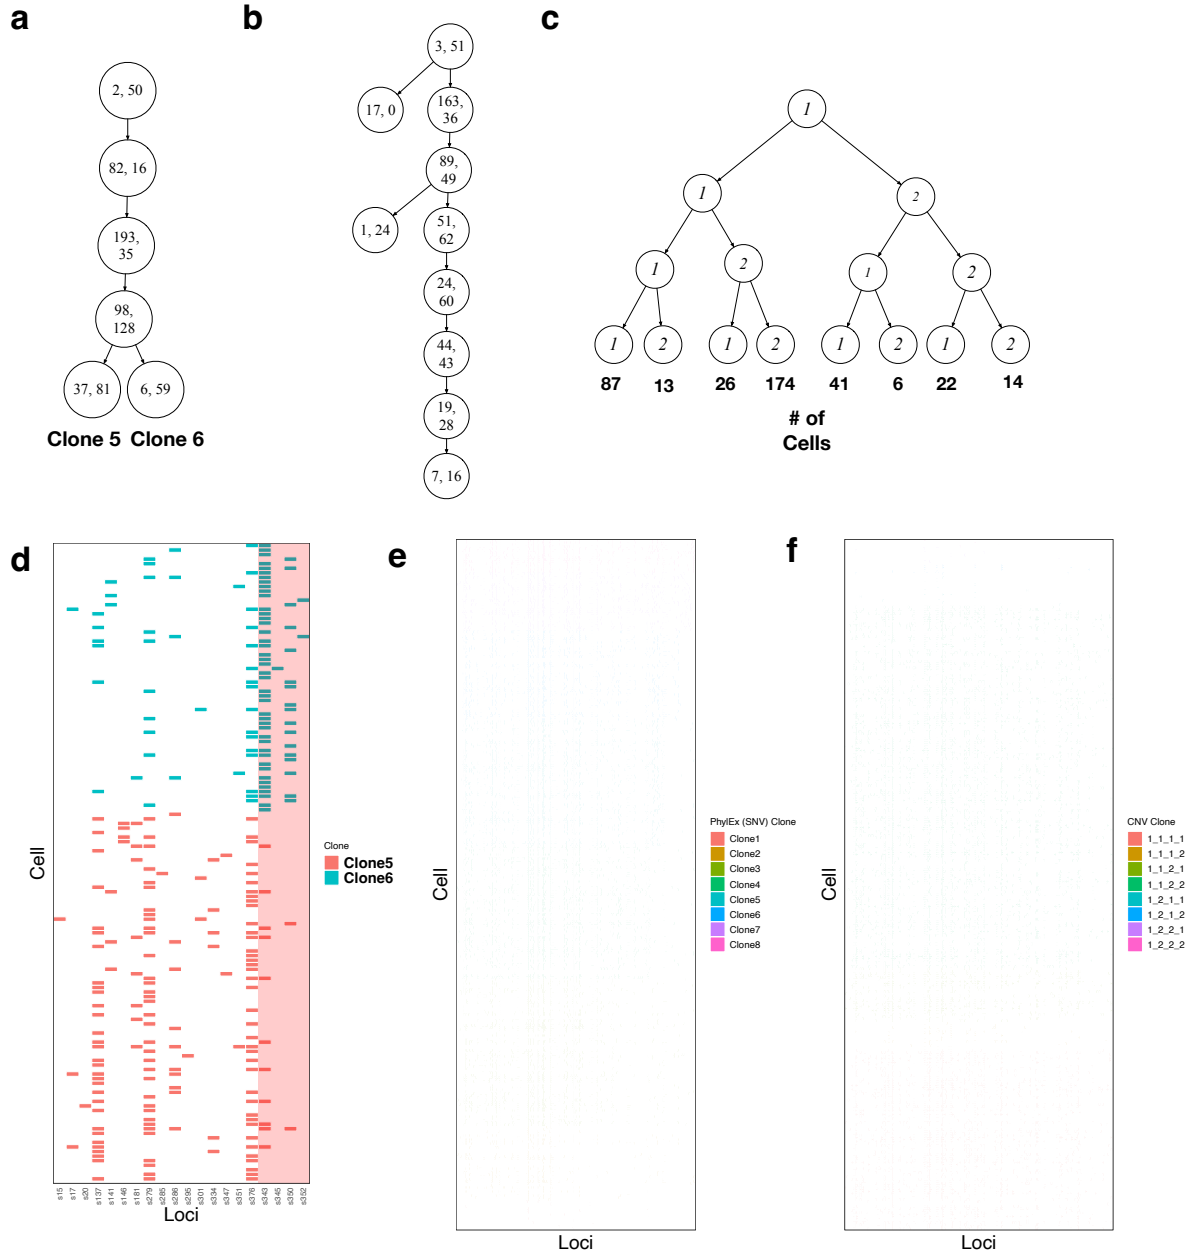

Supplementary Figure 6: Additional HER2+ breast cancer analysis results. a. tree inferred from TSSB, b. tree inferred from PhylEx before pruning. The number inside the node indicates the # of SNVs and the # of cells assigned to each clone. c. CNV clones (leaf nodes) and the tree inferred by InferCNV. The number below the leaf node indicates the # of cells assigned to each clone. d. Plot of binarized variant read counts to indicate absence/presence of variant read for each loci for cells on clone 5 and clone 6 from TSSB tree shown in a. e. mutation and cells ordered by PhylEx clones supporting linear expansion. f. cells ordered by CNV clones inferred from InferCNV tree shown in c. Source data are provided as a Source Data file.



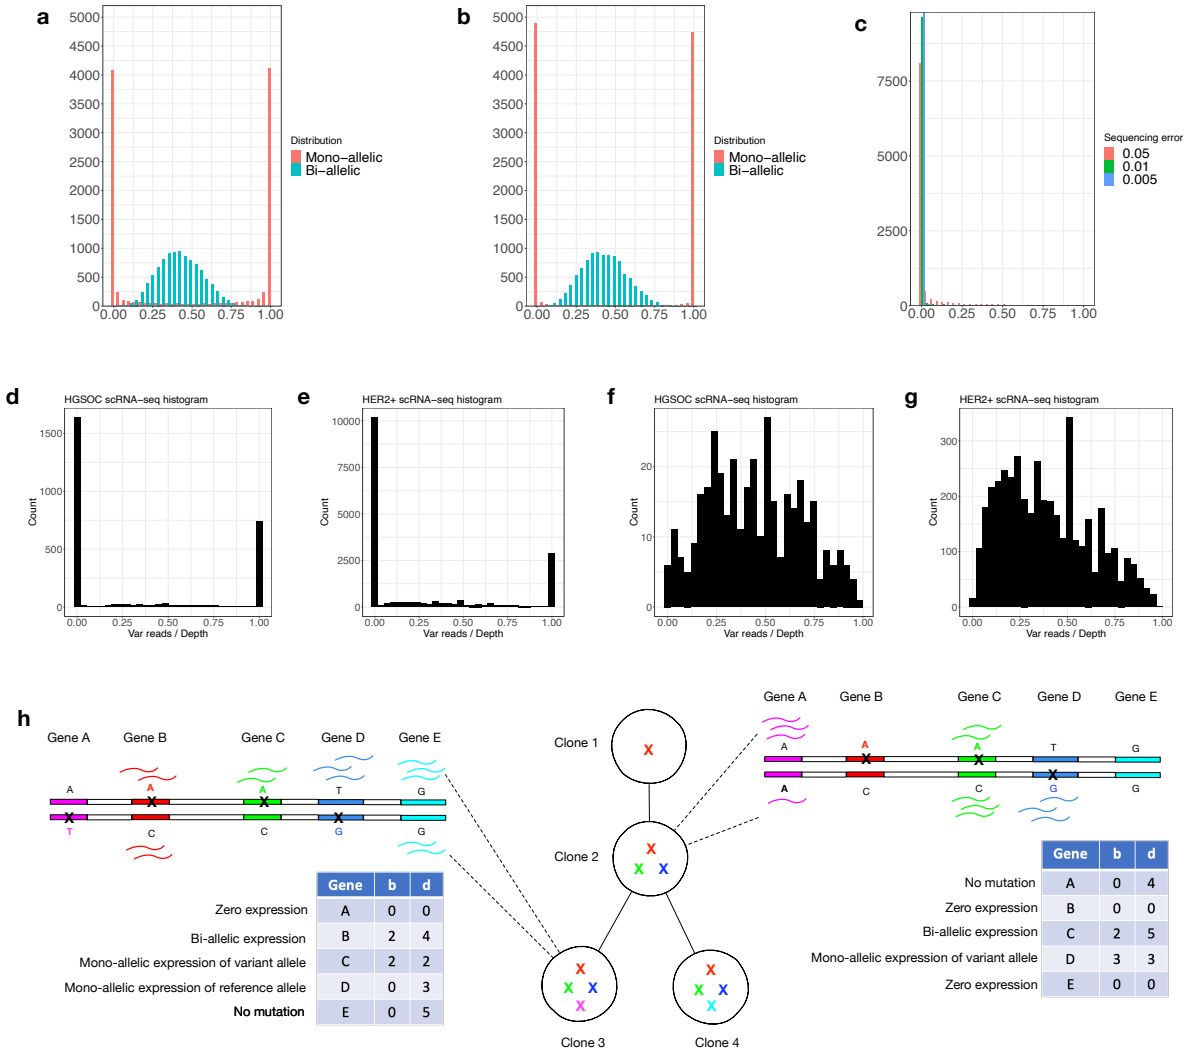

Supplementary Figure 7: a. Beta-Binomial mixture distribution with  $\alpha_0 = \beta_0 = 0.05$ , b.  $\alpha_0 = \beta_0 = 0.01$ ; the values for the biallelic hyper parameters supplied are  $\alpha_n = 5, \beta_n = 7$ . As  $\alpha_0, \beta_0$  decreases, the mass in the mono-allelic distribution concentrates near 0 and 1. c. The ratio of variant reads to depth for the error distribution for  $\epsilon \in \{0.05, 0.01, 0.005\}$ . Plot of scRNA-seq reads for HGSOC and HER2+ data. d,e. Plot of the ratio of variant reads to depth for scRNA-seq across all loci. f-g. Plot of the ratio of variant reads to depth for scRNA-seq for subset of the data without the extremes at 0 and 1. h. Gene expression profile of a cell taken from Clone 3: Gene A is not expressed; both alleles of Gene B are expressed; Genes C and D are mono-allelic expression of variant and reference alleles; Gene E is not mutated and hence, only the reference allele can be expressed. We use  $b$  and  $d$  to denote variant read counts and read depth. Source data for a-g are provided as a Source Data file.

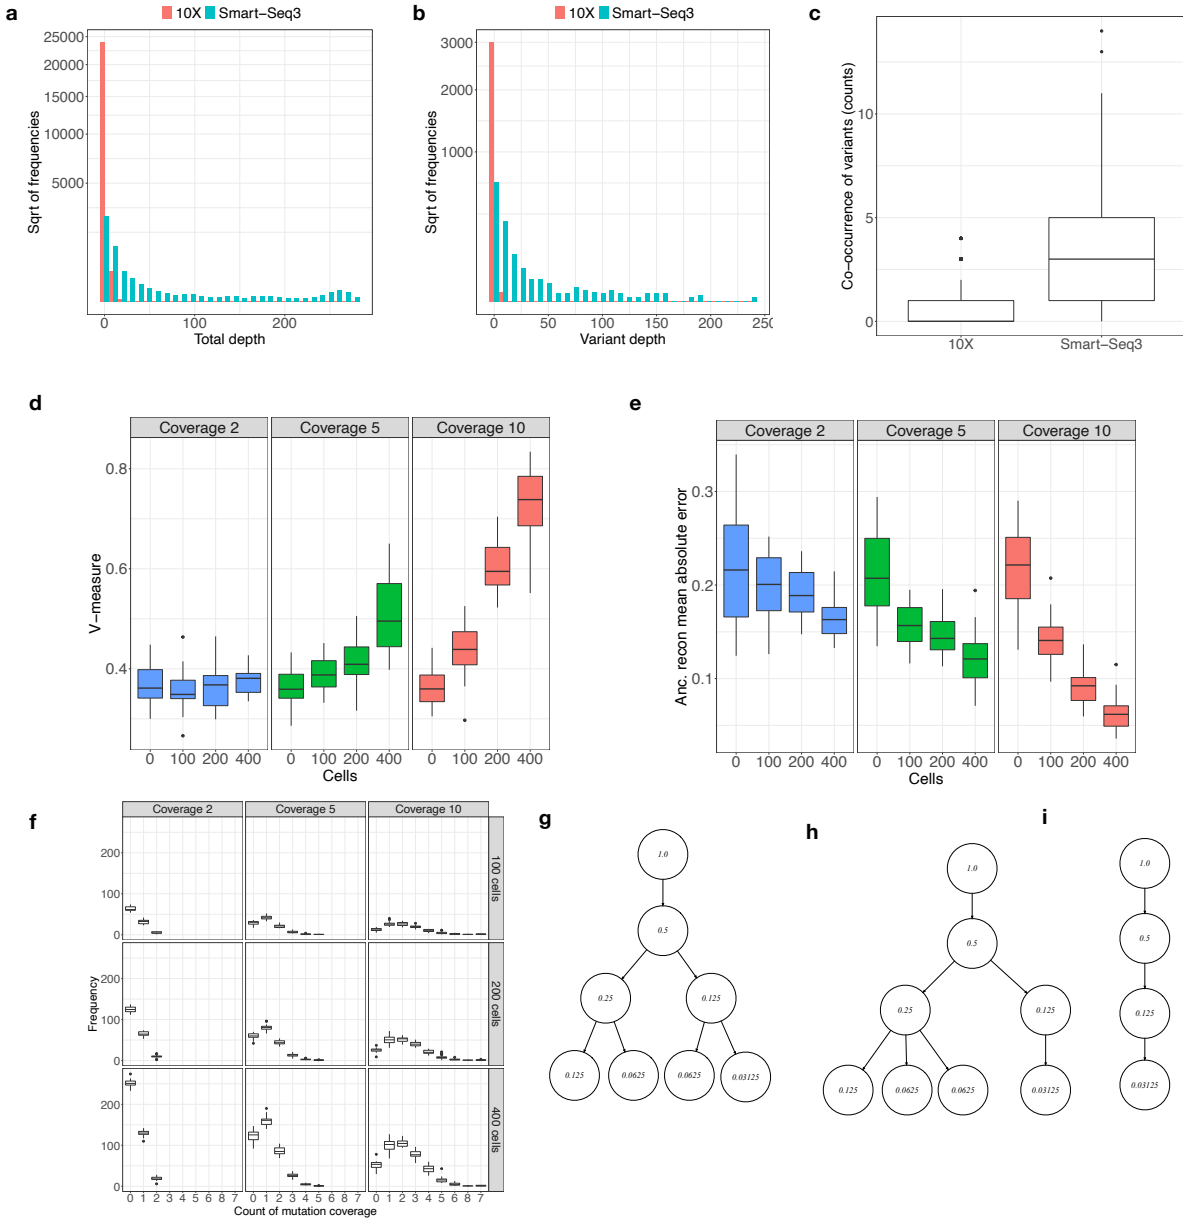

Supplementary Figure 8: a-b. Histogram of total depth and variant depth across all loci over all cells sequenced from HGSOc cell-line using 10X and Smart-Seq3. c. The boxplot showing the number of mutations co-occurring in cells. d-e. V-measure metric and ancestral reconstruction error to demonstrate the effect of coverage on the performance of PhyEx. f. Number of mutations covered by cells in the simulated dataset at different coverage rates (columns) and cells (rows). The boxplot is generated with 20 replicates for each experimental condition and shows the median and inter-quantile range (IQR) at the 1st and the 3rd quantiles. The top (bottom) whisker indicates the maximal (minimal) point no further than  $1.5 \times$  IQR from the third (first) quantile. g. Binary tree used in the simulation. h. An example of a multifurcating tree used in the simulation. i. A linear tree used in the simulation. Source data for a-f are provided as a Source Data file.

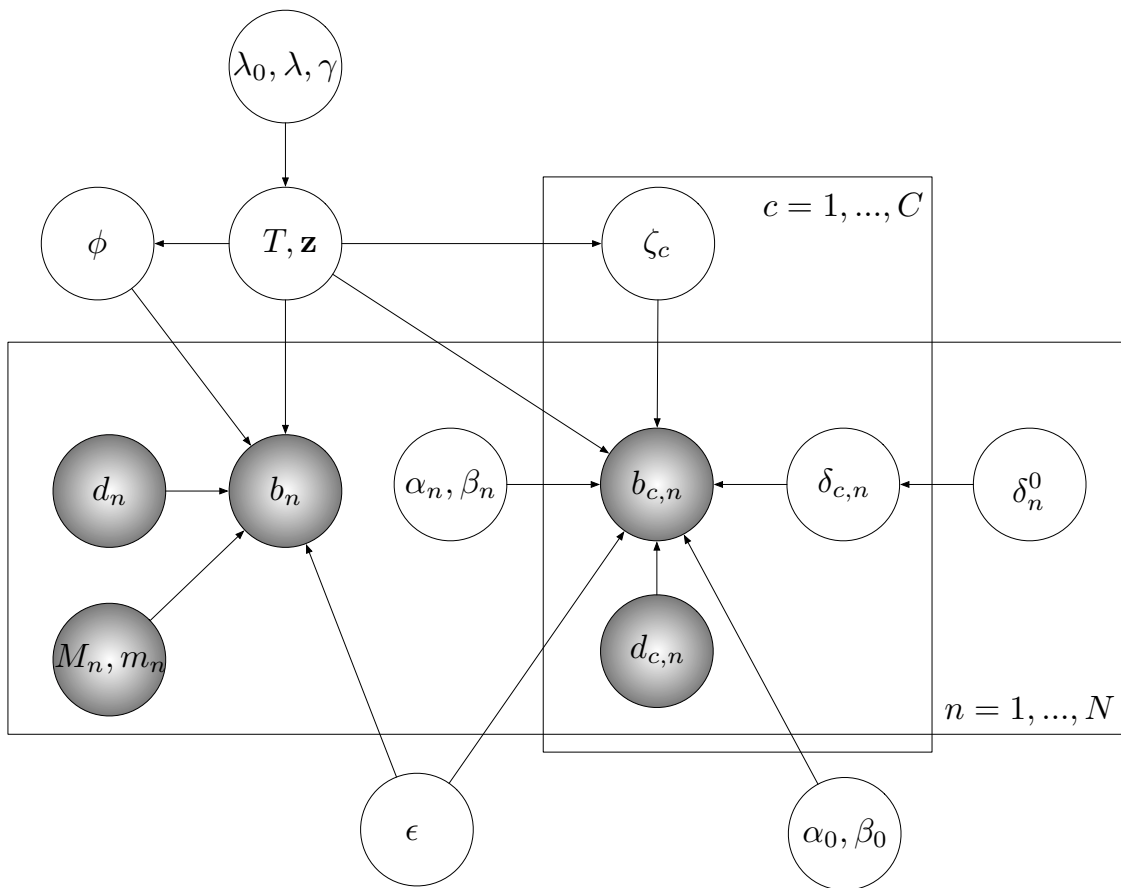

Supplementary Figure 9: PhylEx probabilistic model depicted as graphical model.
